# Supplementary material
Source: publisher site journal article supplement (https://www.dovepress.com/article/357820)
Supplement: Supplementary file 1 [file get_supplementary_file.php]

**Characteristics of patients with chronic obstructive pulmonary disease treated with long-acting bronchodilators in a real-world setting in Singapore: a single-center observational study**

**Authors:** Marcus Sim,1 Anthony Yii,1 Xiaomeng Xu,2 Priti Bahety,3 Chee Hong Loh,1 Aldo Amador Navarro Rojas,4 Dominique Milea,2 Augustine Tee1

**Affiliations:** 1Department of Respiratory and Critical Care Medicine, Changi General Hospital, Singapore; 2Value Evidence & Outcomes, Greater China and Intercontinental, GSK, Singapore; 3Medical Affairs, GSK, Singapore, 4Respiratory & Specialty Medical Lead, Greater China and Intercontinental, GSK, Singapore

**Corresponding author:** Marcus Sim

**Address:** Department of Respiratory and Critical Care Medicine, Changi General Hospital, 2 Simei Street 3, Singapore 529889

**Tel:** +656788 8833

**Email:** marcus.sim@mohh.com.sg

**Running header:** Characterization of patients with COPD in Singapore

**Word count:** 4311

**Tables/figures:** 3 (Supplementary: 4)

# Supplementary Materials

**Supplementary Table S1** ICD-10 CM codes used for computing a table for the codes used for computing the Elixhauser index.

| ICD-10 | Codes |
| --- | --- |
| Congestive heart failure | I09.9, I11.0, I13.0, I13.2, I25.5, I42.0, 142.5–I42.9, I43.x, I50.x, P29.0 |
| Peripheral vascular disorders | I70.x, I71.x, I73.1, I73.8, I73.9, I77.1, I79.0, I79.2, K55.1, K55.8, K55.9, Z95.8, Z95.9 |
| Hypertension | I10. x, I11.x–I13.x, I15.x |
| Chronic pulmonary disease | I27.8, 127.9, J40.x–J47.x, J60.x–J67.x, J68.4, J70.1, J70.3 |
| Diabetes, uncomplicated | E10.0, E10.1, E10.9, E11.0, E11.1, E11.9, E12.0, E12.1, E12.9, E13.0, E13.1, E13.9, E14.0, E14.1, E14.9 |
| Diabetes, complicated | E10.2–E10.8, E11.2–E11.8, E12.2–E12.8, E13.2–E13.8, E14.2–E14.8 |
| Renal failure | I12.0, I13.1, N18.x, NI9.x, N25.0, Z49.0–Z49.2, Z94.0, Z 1 99.2 |
| Liver disease | B18.x, I85.x, I86.4, I98.2, K70.x, K71.1, K71.3–K71.5, K71.7, K72.xK74.x, K76.0, K76.2–K76.9. Z94.4 |
| Peptic ulcer disease excluding bleeding | K25.7, K25.9, K26.7, K26.9, K27.7, K27.9, K28.7, K28.9AIDS/H1VB20.x–B22.x, B24.x |
| Metastatic cancer | C77.x–C80.x |
| Rheumatologic arthritis/collagen vascular diseases | L94.0, L94.1, L94.3, M05.x, M06.x, M08.x, M12.0, M12.3, M30.x, M31.0-M31.3, M32.x–M35.x, M45.x, M46.1, M46.8, M46.9 |
| Depression | F20.4, F31.3–F31.5, F32.x, F33.x, F34.1, F41.2, F43.2 |

ICD-10 CM, International Classification of Diseases, Tenth Revision Clinical Modification

**Supplementary Table S2.** Sample sizes calculated for statistical comparison on baseline characteristics with at least 0.8 power.

| **Baseline characteristic** | **MID** | **Patients** |
| --- | --- | --- |
| Age, | 5 | 128 |
| BMI, | 3 | 28 |
| Blood eosinophil count | 200 | 34 |
| CAT score | 3 | 174 |
| FEV1, L | 0.2 | 88 |
| FEV1 percentage | 10 | 116 |

CAT, COPD assessment Test; FEV1, forced expiratory volume in 1 second; MID, minimal important difference

**Supplementary Table S3** Baseline characteristics of patient population including patients who died during the follow-up period.

|  | **Main analysis** | | | | **Sensitivity analysis** | | | |
| --- | --- | --- | --- | --- | --- | --- | --- | --- |
| **Characteristic** | **All**  **(N=347)** | **LAMA**  **(N=99)** | **LAMA+LABA**  **(N=248)** | **P-value** | **All**  **(N=208)** | **LAMA**  **(N=46)** | **LAMA+LABA**  **(N=162)** | **P-value** |
| Age, years, mean (SD) | 73 (9.8) | 73 (10.8) | 73 (9.4) | 0.70 | 73 (9.4) | 72 (10.9) | 73 (9.0) | 0.44 |
| Male, n (%) | 317 (91.4) | 89 (89.9) | 228 (91.9) | 0.37 | 191 (91.8) | 43 (93.5) | 148 (91.4) | 0.64 |
| Ethnicity, n (%) |  |  |  |  |  |  |  |  |
| Chinese | 219 (63.1) | 62 (62.6) | 157 (63.3) | 0.94 | 131 (63.0) | 32 (69.6) | 99 (61.1) | 0.46 |
| Malay | 79 (22.8) | 6 (6.1) | 57 (23.0) | 50 (24.0) | 7 (15.2) | 43 (26.5) |
| Indian | 17 (4.9) | 22 (22.2) | 11 (4.4) | 11 (5.3) | 3 (6.5) | 8 (4.9) |
| Other races | 32 (9.2) | 9 (9.1) | 23 (9.3) | 16 (7.7) | 4 (8.7) | 12 (7.4) |
| Smoking history,a n (%) |  |  |  |  |  |  |  |  |
| Former smoker | 144 (47.8) | 41 (48.8) | 103 (47.5) | 0.96 | 76 (44.4) | 16 (47.1) | 60 (44.4) | 0.52 |
| Current smoker | 134 (44.5) | 37 (44.0) | 97 (44.7) | 82 (48.0) | 17 (50.0) | 62 (47.4) |
| Non-smoker | 23 (7.6) | 6 (7.1) | 17 (7.8) | 13 (7.6) | 1 (2.9) | 12 (8.8) |
| Unknown | 46 (13.3) | 15 (15.1) | 31 (12.5) |  | 37 (17.8) | 12 (26.1) | 28 (17.3) |  |
| BMI, median,a kg/m2 (IQR) | 20.7 (18.3–24.3) | 22.0 (19.3–25.5) | 20.6 (18.0–24.1) | 0.06 | 21.5 (19.0–24.5) | 22.4 (20.3–25.9) | 21.1 (18.8–24.2) | 0.20 |
| Known, n (%) | 273 (78.7) | 74 (74.7) | 199 (80.2) |  | 159 (76.4) | 29 (63.0) | 130 (80.2) |  |
| Unknown, n (%) | 74 (21.3) | 25 (25.3) | 49 (19.8) |  | 49 (23.6) | 17 (37.0) | 32 (19.8) |  |
| Moderate-to-severe exacerbation historyb |  |  |  |  |  |  |  |  |
| Baseline period, mean | 0.55 | 0.37 | 0.62 | 0.02 | 0.72 | 0.41 | 0.81 | 0.02 |
| ≥1 in baseline period, n (%) | 150 (43.2) | 34 (34.3) | 116 (46.8) | 0.03 | 100 (48.1) | 14 (30.4) | 86 (53.1) | 0.007 |
| CAT score, median (IQR) | 11 (7–16) | 8 (4–13) | 13 (8–17) | 0.006 | 10 (6–14) | 6 (3–11) | 11 (7–15) | 0.002 |
| Known, n (%) | 161 (46.4) | 46 (46.5) | 115 (46.4) |  | 10.5 (50.5) | 21 (45.7) | 84 (51.9) |  |
| Unknown, n (%) | 186 (53.6) | 53 (53.5) | 133 (53.6) |  | 103 (49.5) | 25 (54.3) | 78 (48.1) |  |
| Lung functiona |  |  |  |  |  |  |  |  |
| Pre-bronchodilator FEV1, median, L (IQR) | 1.36 (1.04–1.76) | 1.61 (1.31–1.98) | 1.28 (0.98-1.70) | 0.001 | 1.42 (1.08–1.83) | 1.67 (1.30–2.00) | 1.33 (1.06–1.77) | 0.04 |
| Pre-bronchodilator FEV1, mean, L (95% CI) | 1.46 (1.38–1.54) | 1.66 (1.51–1.81) | 1.39 (1.30–1.48) |  | 1.42 (1.33–1.53) | 1.60 (1.37–1.83) | 1.39 (1.28–1.50) |  |
| Pre-bronchodilator FEV1 percent predicted, median (IQR) | 61 (51–80) | 73 (61–91) | 59 (46–77) | <0.001 | 61 (48–78) | 72 (55–92) | 59 (47–77) | 0.10 |
| Pre-bronchodilator FEV1 percent predicted, mean (95% CI) | 66 (63–69) | 77 (71–83) | 62 (58–65) |  | 65 (61–69) | 72 (62–82) | 63 (58–67) |  |
| Known, n (%) | 201 (57.9) | 44 (44.4) | 147 (59.3) |  | 114 (54.8) | 22 (47.8) | 92 (56.8) |  |
| Unknown, n (%) | 146 (42.1) | 45 (45.5) | 101 (40.7) |  | 94 (45.2) | 24 (52.2) | 70 (43.2) |  |
| GOLD spirometric grade, n (%) |  |  |  | 0.002 |  |  |  | 0.56 |
| Grade 1 (FEV1 ≥80%) | 54 (26.9) | 22 (40.7) | 32 (21.8) |  | 30 (24.8) | 8 (33.3) | 22 (22.7) |  |
| Grade 2 (FEV1 ≥50–<80%) | 98 (48.8) | 28 (51.9) | 70 (47.6) | 55 (45.5) | 11 (45.8) | 44 (45.4) |
| Grade 3 (FEV1 ≥30–<50%) | 43 (21.4) | 4 (7.4) | 39 (26.5) | 33 (27.3) | 5 (20.8) | 28 (28.9) |
| Grade 4 (FEV1 <30%) | 6 (3.0) | 0 (0) | 6 (4.1) | 3 (2.5) | 0 (0.0) | 3 (3.1) |
| Unknown, n (%) | 146 (42.1) | 45 (45.5) | 101 (40.7) |  | 87 (41.8) | 22 (47.8) | 65 (40.1) |  |
| Blood eosinophil count, 109 cells/L, median (IQR) | 0.1 (0.00–0.30) | 0.1 (0.05–0.30) | 0.1 (0.00–0.30) | 0.42 | 0.1 (0.05–0.30) | 0.1 (0.05–0.32) | 0.1 (0.05–0.30) | 0.41 |
| Known, n (%) | 327 (94.2) | 86 (86.9) | 241 (97.2) |  | 200 (96.2) | 44 (95.7) | 156 (96.3) |  |
| Unknown, n (%) | 20 (5.8) | 13 (13.1) | 7 (2.8) |  | 8 (3.8) | 2 (4.3) | 6 (3.7) |  |

aMost recent values before index date; bModerate-to-severe COPD-related exacerbations were defined as an inpatient hospitalization or emergency department visit with a COPD exacerbation diagnosis code in the primary diagnosis.

BMI, body mass index; CAT, COPD Assessment Test; CI, confidence interval; COPD, chronic obstructive pulmonary disease; FEV1, forced expiratory volume in 1 second; GOLD, Global Initiative for Chronic Obstructive Lung Disease; IQR, interquartile range; LABA, long-acting β2-agonist; LAMA, long-acting muscarinic antagonist; SD, standard deviation

**Supplementary Table S4** Proportion of patients with clinical worsening, a moderate-to-severe exacerbation, a change in treatment by index maintenance therapy or who died during the follow-up period.

|  | **Main analysis** | | | | **Sensitivity analysis** | | |
| --- | --- | --- | --- | --- | --- | --- | --- |
| **Patients, n (%)** | **Overall  (N=347)** | **LAMA  (N=99)** | **LAMA+LABA (N=248)** | **Overall  (N=208)** | | **LAMA  (N=46)** | **LAMA+LABA (N=162)** |
| Death or clinical worseninga | 210 (60.5) | 64 (64.6) | 146 (58.9) | 126 (60.6) | | 24 (52.2) | 102 (63.0) |
| ≥1 moderate-to-severe exacerbation | 114 (32.8) | 24 (24.2) | 90 (36.3) | 74 (35.6) | | 10 (21.7) | 64 (39.5) |
| Change in treatment | 36 (10.4) | 22 (22.2) | 14 (5.6) | 20 (9.6) | | 9 (19.6) | 11 (6.8) |
| ≥1 moderate-to-severe exacerbation and change in treatmentb | 5 (1.4) | 2 (2.0) | 3 (1.2) | 2 (1.0) | | 1 (2.2) | 1 (0.6) |
| Death without clinical worsening | 55 (15.8) | 16 (16.1) | 39 (15.7) | 30 (14.4) | | 4 (8.7) | 26 (16.0) |

aAnalyzed based on the first clinical worsening event (ie, a first moderate-to-severe exacerbation, a first change in treatment by index maintenance therapy) or death, whichever occurred first. bOccurred on the same day.

LABA, long-acting β2-agonist; LAMA, long-acting muscarinic antagonist
